# Supplementary material for: Benefits of net-zero policies for future ozone pollution in China
Source: Copernicus journal article supplement (doi:10.5194/acp-23-13755-2023), 2023-11-06
Supplement: Supplementary file 1 [file acp-23-13755-2023-supplement.pdf]

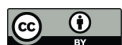

*Supplement of*

## **Benefits of net-zero policies for future ozone pollution in China**

**Zhenze Liu et al.**

*Correspondence to:* Zhenze Liu (zhenze.liu@nuist.edu.cn)

The copyright of individual parts of the supplement might differ from the article licence.

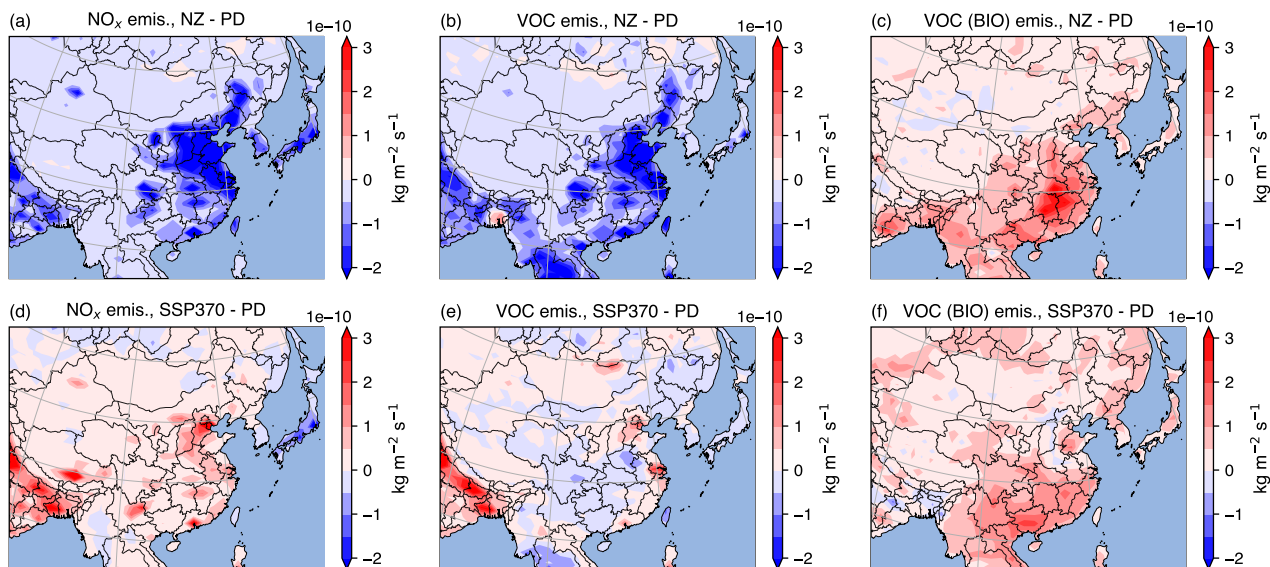

**Figure S1.** Differences in annual mean surface emissions in anthropogenic and biomass burning  $\text{NO}_x$ , VOCs, and biogenic VOCs (BIO) between the present day (PD) and the scenarios of Net Zero (NZ; **a, b, c**) and SSP3-7.0 (**d, e, f**).

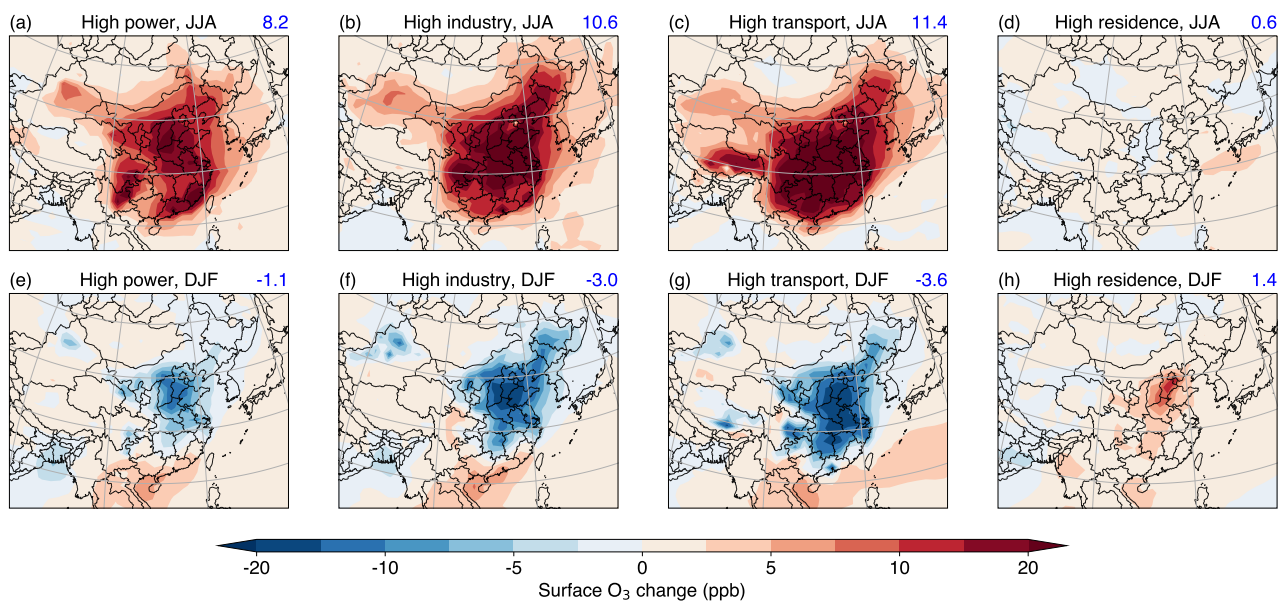

**Figure S2.** Changes in seasonal (JJA and DJF) surface  $\text{O}_3$  mixing ratios between the scenario of Net Zero and SSP3-7.0 (SSP3-7.0 – Net Zero). Influences of higher emissions in different individual sectors, (**a, e**) power, (**b, f**) industry, (**c, g**) transport and (**d, h**) residence on surface  $\text{O}_3$  changes are shown separately. Mean  $\text{O}_3$  changes over China are given in the top right corner.

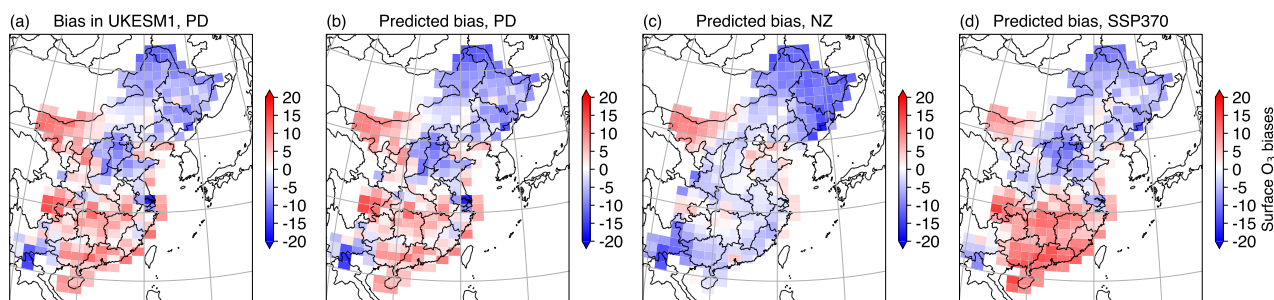

**Figure S3.** Annual mean biases in surface O<sub>3</sub> simulations (ppb) from (a) UKESM1, and the predicted biases in (b) the present day (PD), (c) the Net Zero (NZ), and (d) the SSP3-7.0 scenarios.

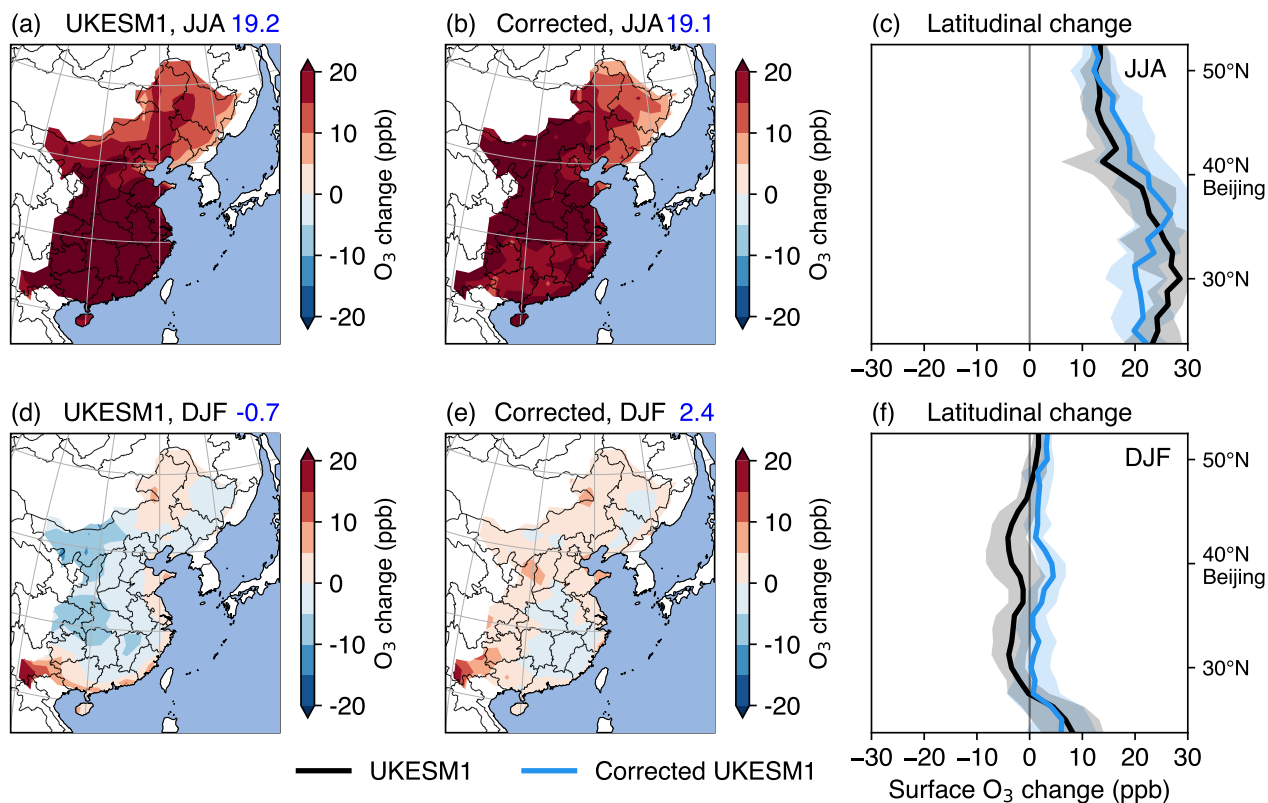

**Figure S4.** Seasonal mean changes in surface O<sub>3</sub> mixing ratios from the present day to the future under SSP3-7.0 in China. Changes from UKESM1 and the corrected UKESM1 by the deep learning model in (a, b) summertime and (d, e) wintertime are shown. Mean latitudinal O<sub>3</sub> change between UKESM1 and the corrected UKESM1 are shown in (c, f), with one standard deviation of O<sub>3</sub> changes in latitude shown in shaded areas.
